# Supplementary material
Source: PubMed Central journal article supplement (PMC3672972)
Supplement: NIHMS50989-supplement-1.pdf [file NIHMS50989-supplement-1.pdf]

**Supplementary Table 1. Number of tumors observed in the lungs 20 and 30 days post-injection for parental NCI-H460 cells and clones NCI-H460 WT Ark 1 and NCI H460 Ark 11.**

|                       | <b>20 days</b> | <b>30 days</b> |
|-----------------------|----------------|----------------|
| <b>H460 Parental</b>  | >150           | 17             |
|                       | >150           | 7              |
|                       | 87             | >150           |
|                       | >150           | 43             |
|                       | 45             | >150           |
| <b>H460 WT Ark 1</b>  | >150           | >150           |
|                       | 4              | >150           |
|                       | >150           | 145            |
|                       | >150           | 3              |
|                       | 65             | >150           |
| <b>H460 WT Ark 11</b> | 69             | >150           |
|                       | 39             | >150           |
|                       | 118            | 66             |
|                       | >150           | >150           |
|                       | >150           | 20             |
