# Supplementary material
Source: PubMed Central journal article supplement (PMC3672972)
Supplement: NIHMS50989-supplement-2.pdf [file NIHMS50989-supplement-2.pdf]

**A**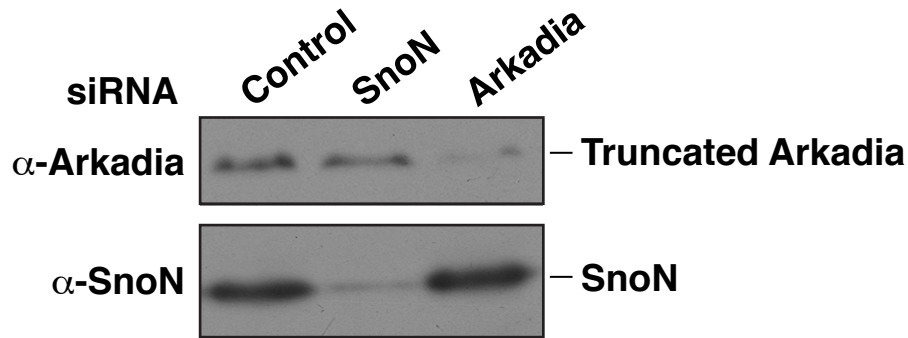**B**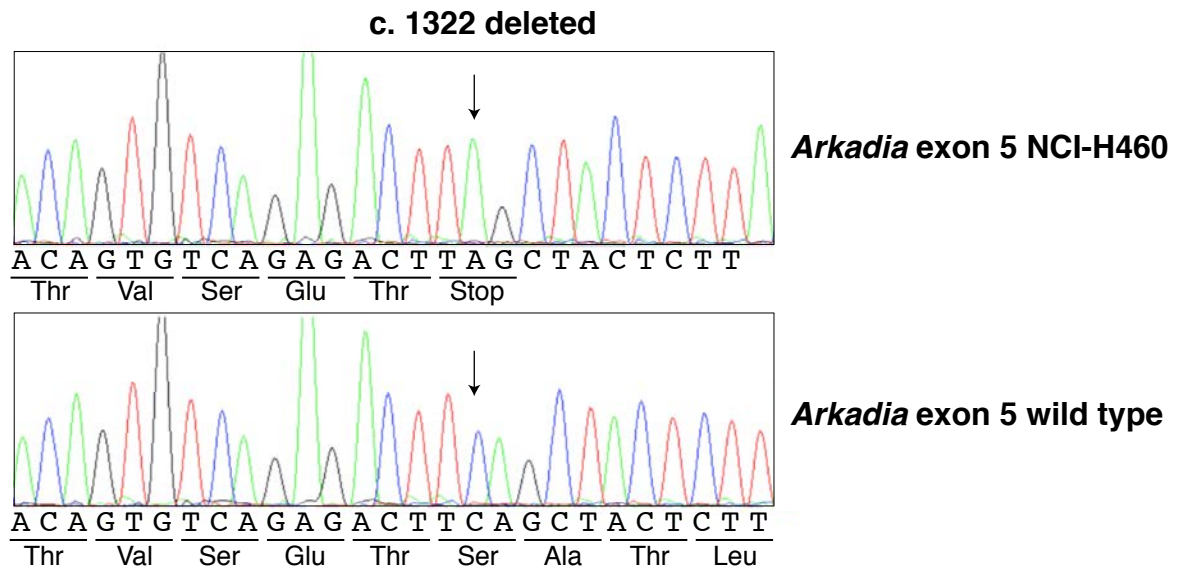

**Supplementary Figure 1. A mutation in the Arkadia gene in NCI-H460 cells produces a truncated protein.** (A) NCI-H460 cells were transfected with non-targeting (control), SnoN and Arkadia siRNAs. Whole cell extracts were Western blotted using antibodies against Arkadia and SnoN. (B) Sequencing of genomic DNA from NCI-H460 and HaCaT cells reveals a deletion of a cytosine in exon 5 at position 1322 in the NCI-H460 cells, which results in an immediate termination codon (c.1322 delete C. p.S441X). The DNA and protein sequence is shown below the traces. The mutation is hemizygous, as one allele is lost and the mutated allele is amplified. This was confirmed in the Sanger Centre CGP LOH and Copy Number Analysis.
