# Supplementary material
Source: PubMed Central journal article supplement (PMC3672972)
Supplement: NIHMS50989-supplement-3.pdf [file NIHMS50989-supplement-3.pdf]

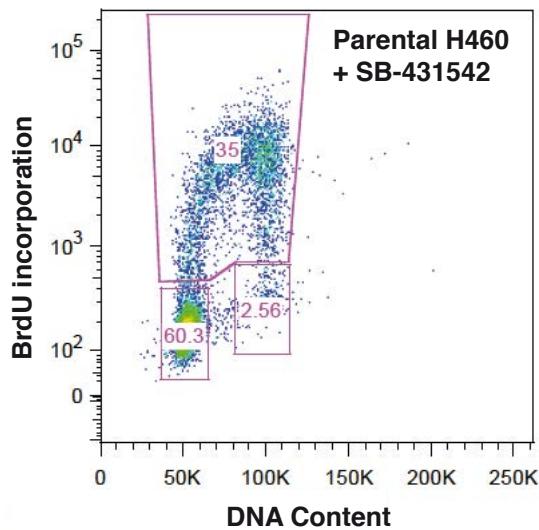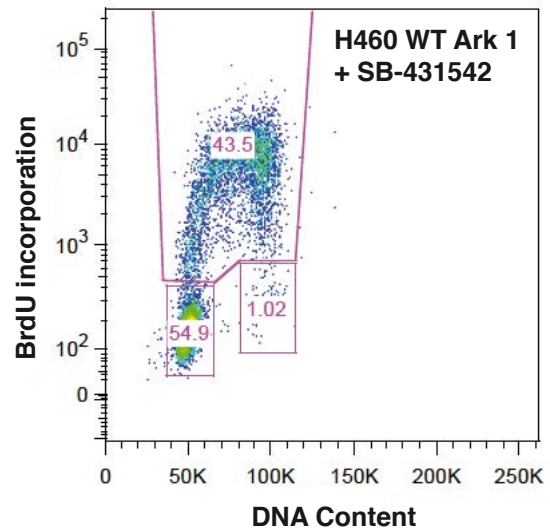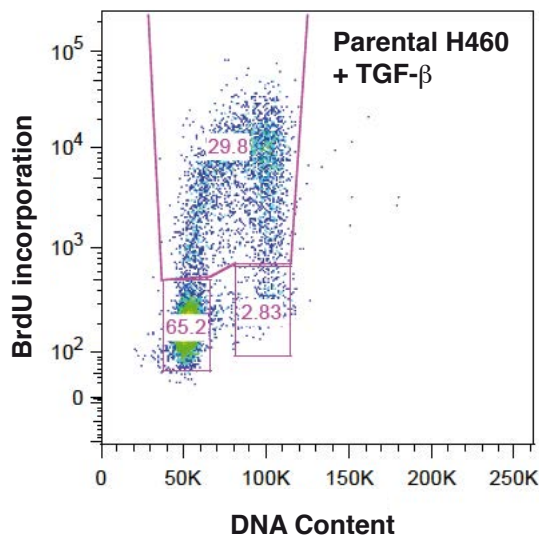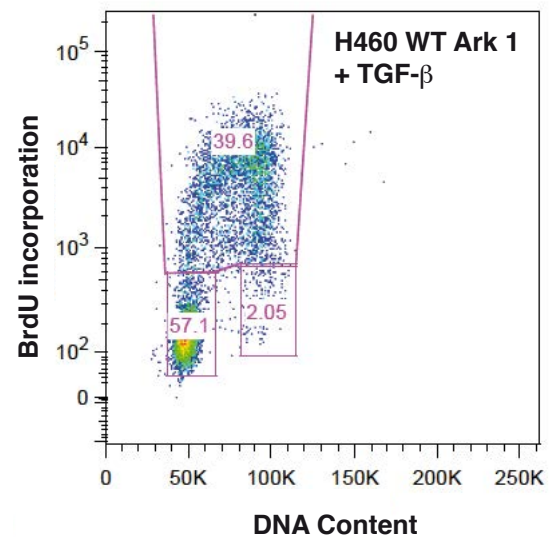

**Supplementary Figure 2. Restoration of Arkadia activity in NCI-H460 cells does not affect cell proliferation.** Parental NCI-H460 and NCI-H460 WT Ark 1 cells were grown to confluency, trypsinized and replated at a lower density in the presence or absence of TGF- $\beta$  or SB-431542. After 21 h cells were labeled with BrdU and after a further 3 h were analyzed by FACS to measure the rate of incorporation of BrdU. FACS plots are shown.
