# Supplementary material
Source: PubMed Central journal article supplement (PMC3672972)
Supplement: NIHMS50989-supplement-4.pdf [file NIHMS50989-supplement-4.pdf]

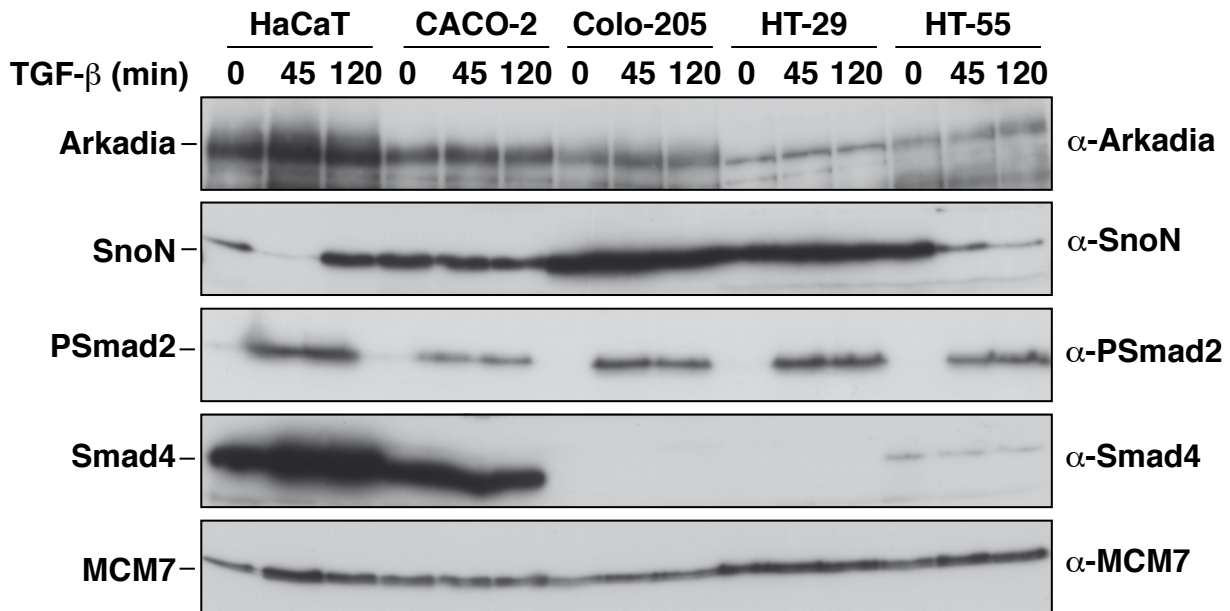

**Supplementary Figure 3. Deletion or mutation of Smad4 results in a resistance to TGF- $\beta$ -induced Ski and SnoN degradation.** Whole cell extracts were obtained from HaCaT cells, and from the colorectal carcinoma cell lines CACO-2 (mutated in Smad4), Colo-205 (Smad4 null), HT-29 (Smad4 null), HT-55 (low levels of Smad4) that had been treated with TGF- $\beta$  for 45 min or 2 h. Immunoblots were performed using specific antibodies against Arkadia, SnoN, P-Smad2, Smad4 and MCM7.
