# Supplementary material
Source: PubMed Central journal article supplement (PMC3672972)
Supplement: NIHMS50989-supplement-5.pdf [file NIHMS50989-supplement-5.pdf]

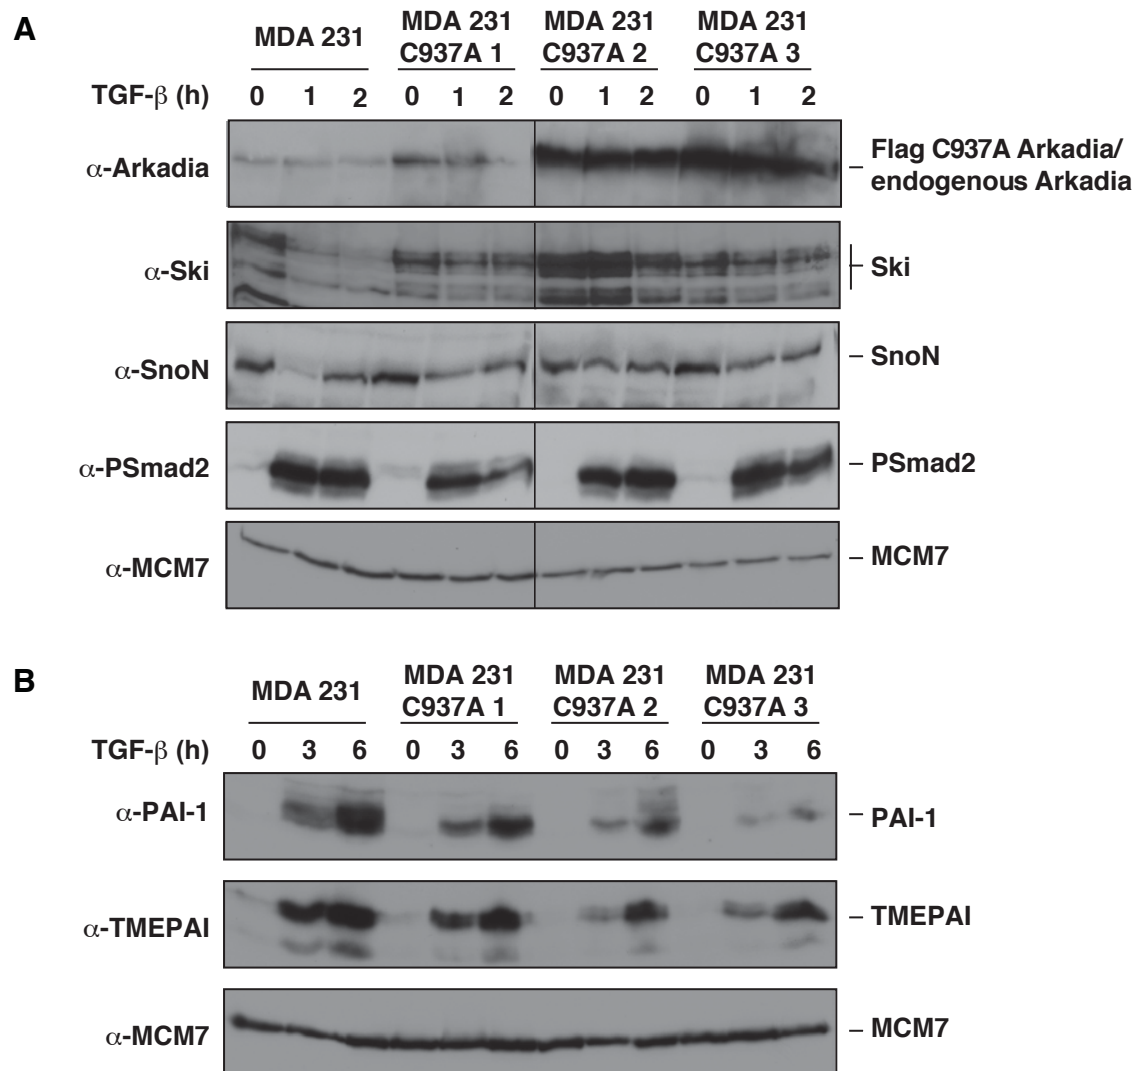

**Supplementary Figure 4.** Molecular characterization of MDA-MB-231 cells stably expressing FLAG-tagged Arkadia C937A. (**A** and **B**) Three different clones of MDA-MB-231 cells expressing Flag-tagged Arkadia C937A were isolated and their response to TGF- $\beta$  was compared with that of the parental MDA-MB-231s. Cells were treated with TGF- $\beta$  for the times indicated and whole cell extracts were prepared, which were Western blotted using the antibodies indicated. For the TMEPAI blot, extracts were treated with PNGase F. The vertical lines indicate where blots have been cut to splice out a marker lane.
