# Supplementary material
Source: PubMed Central journal article supplement (PMC3672972)

**A**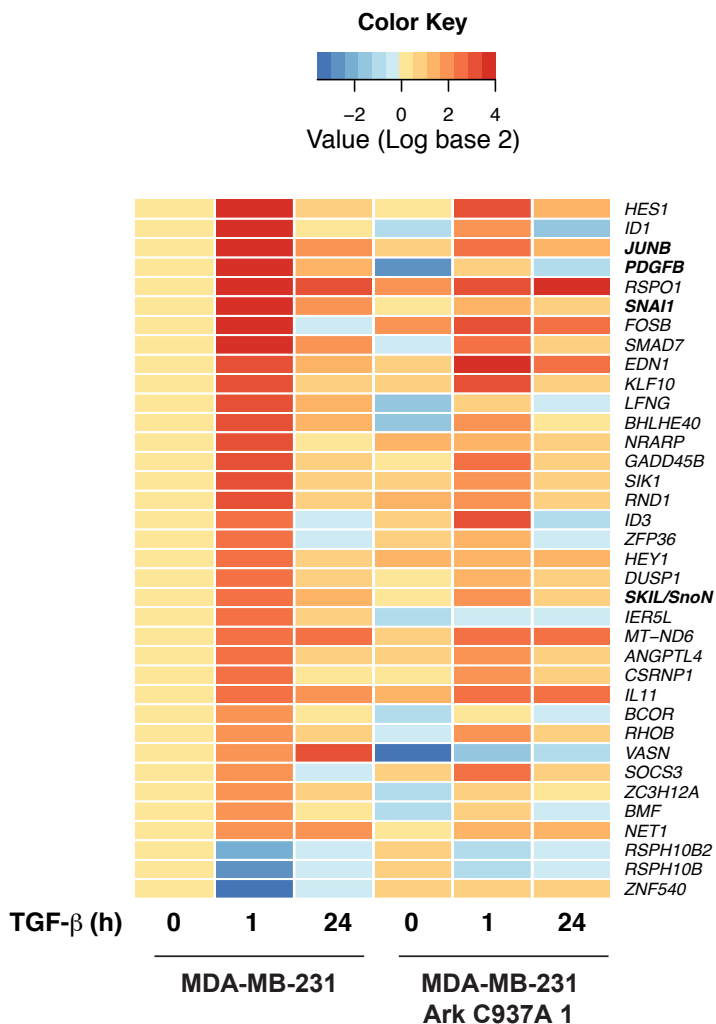

**Supplementary Figure 5. Inactivation of Arkadia perturbs the TGF- $\beta$ -regulated transcriptional response of MDA-MB-231 cells at 1 h and 24 h post TGF- $\beta$  stimulation. (A and B)** Total RNA was obtained from parental MDA-MB-231 cells or a clone expressing Arkadia C937A (clone 1) that were either untreated or stimulated with TGF- $\beta$  for 1 h and 24 h. Gene expression analysis was performed in duplicate by RNA-seq using a Illumina GAllx (Solexa) platform and the number of reads were normalized across the samples. The reads for each gene were then normalized to the uninduced level in the parental cells. The heatmaps show the genes that are maximally regulated by TGF- $\beta$  in the parental cells at 1 h (**A**) or 24 h (**B**) (false discovery rate < 0.05 and fold change relative to untreated samples > 2), and the behavior of these genes in the Arkadia C937A-expressing cells. The scale is logarithmic base 2. The genes are ordered according to the fold induction at 1 h or 24 h in the parental cells. Genes in bold are those which we have validated by qPCR (Fig. 3; Fig. S6).

**B**

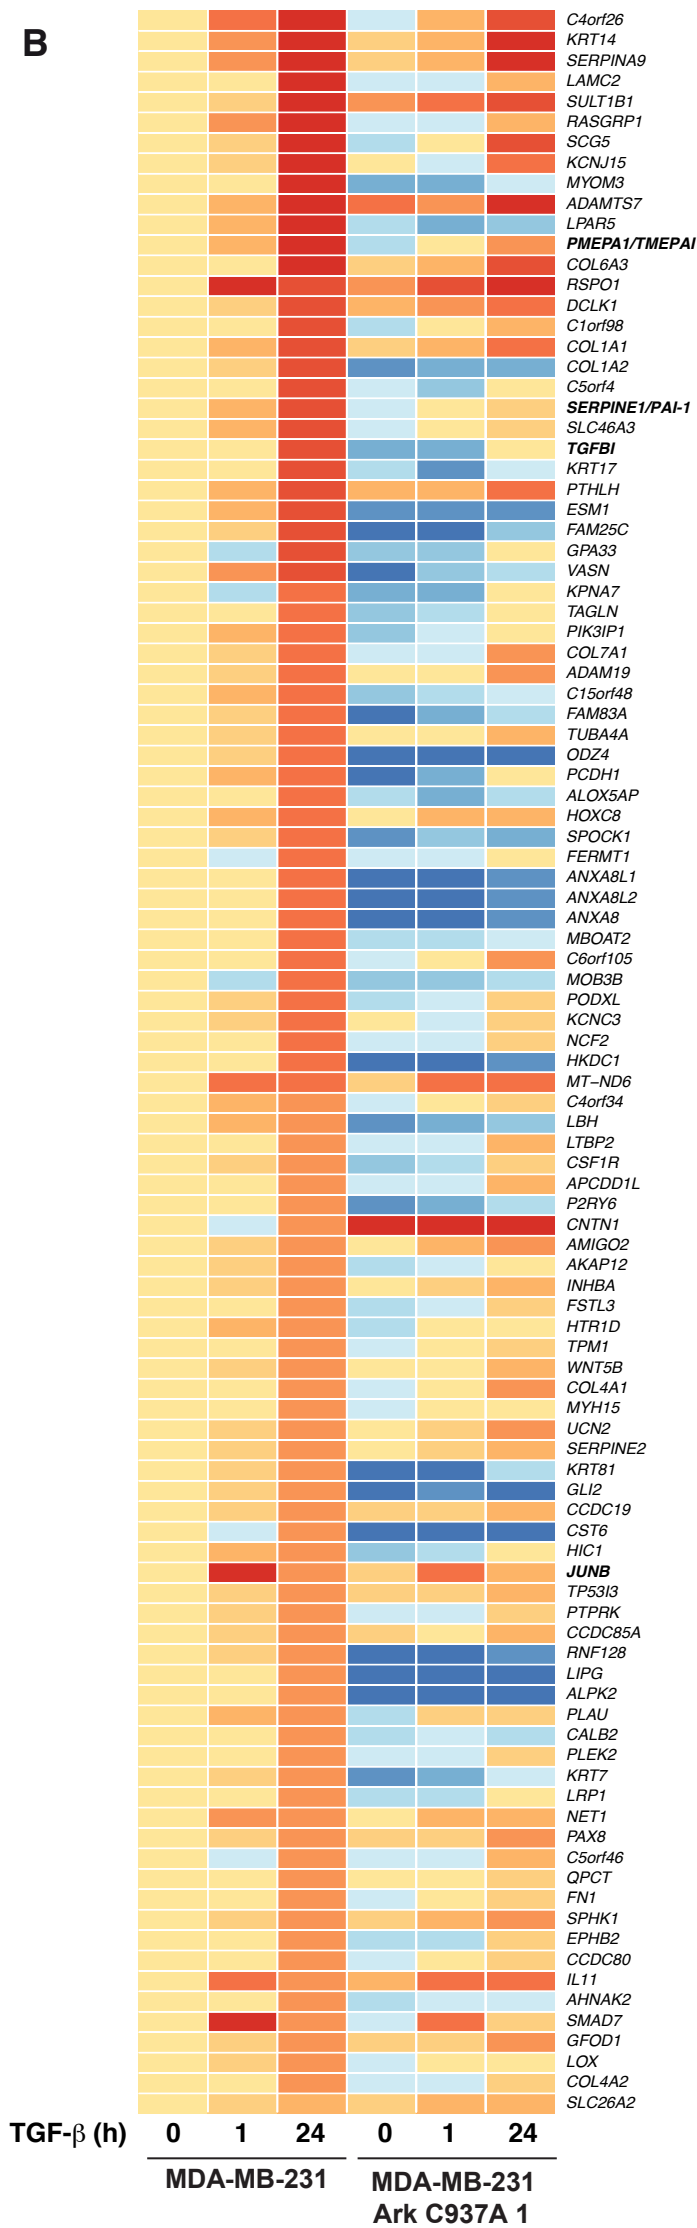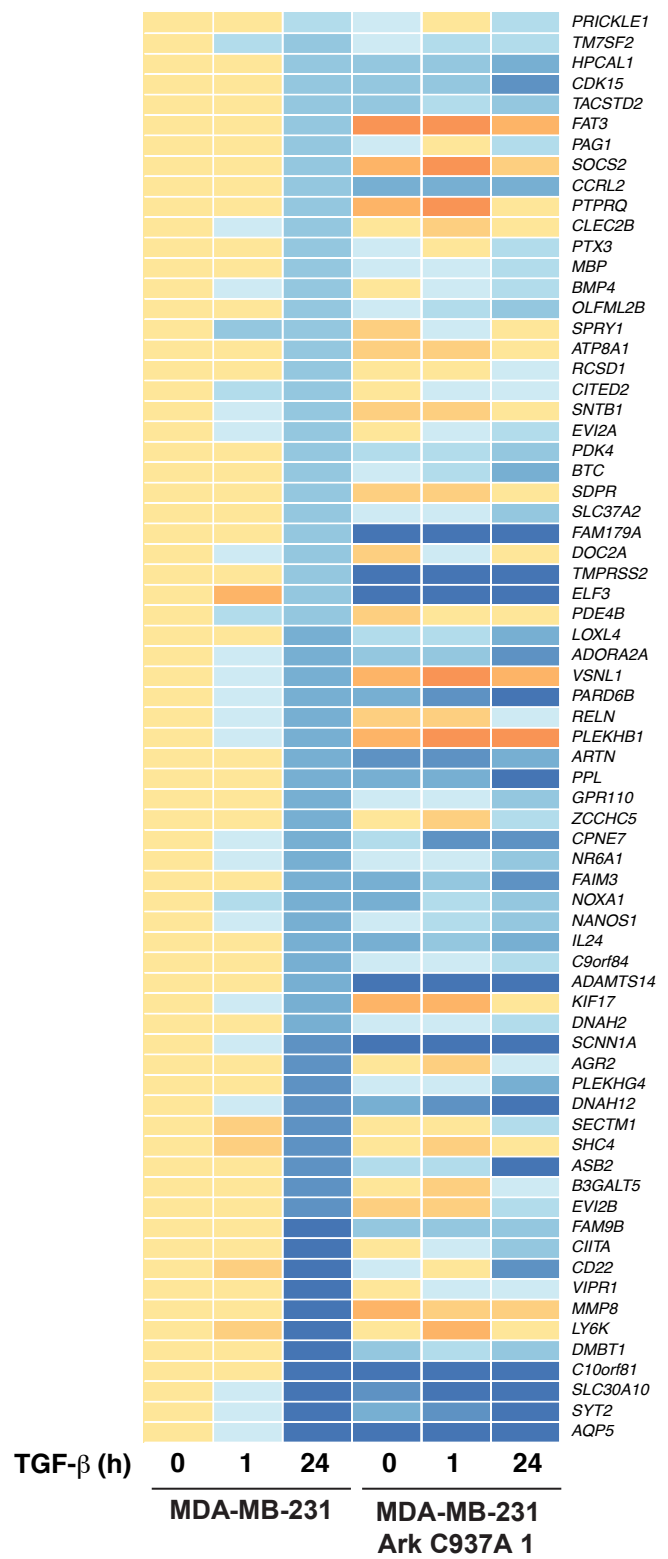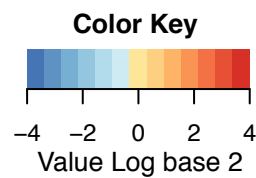

Supplement: NIHMS50989-supplement-6.pdf [file NIHMS50989-supplement-6.pdf]
